# Supplementary material
Source: PubMed Central journal article supplement (PMC6511757)
Supplement: ajtr0011-2590-f6.pdf [file ajtr0011-2590-f6.pdf]

LMWF attenuates pulmonary fibrosis through TGF- $\beta$ 1/ERK signaling pathway

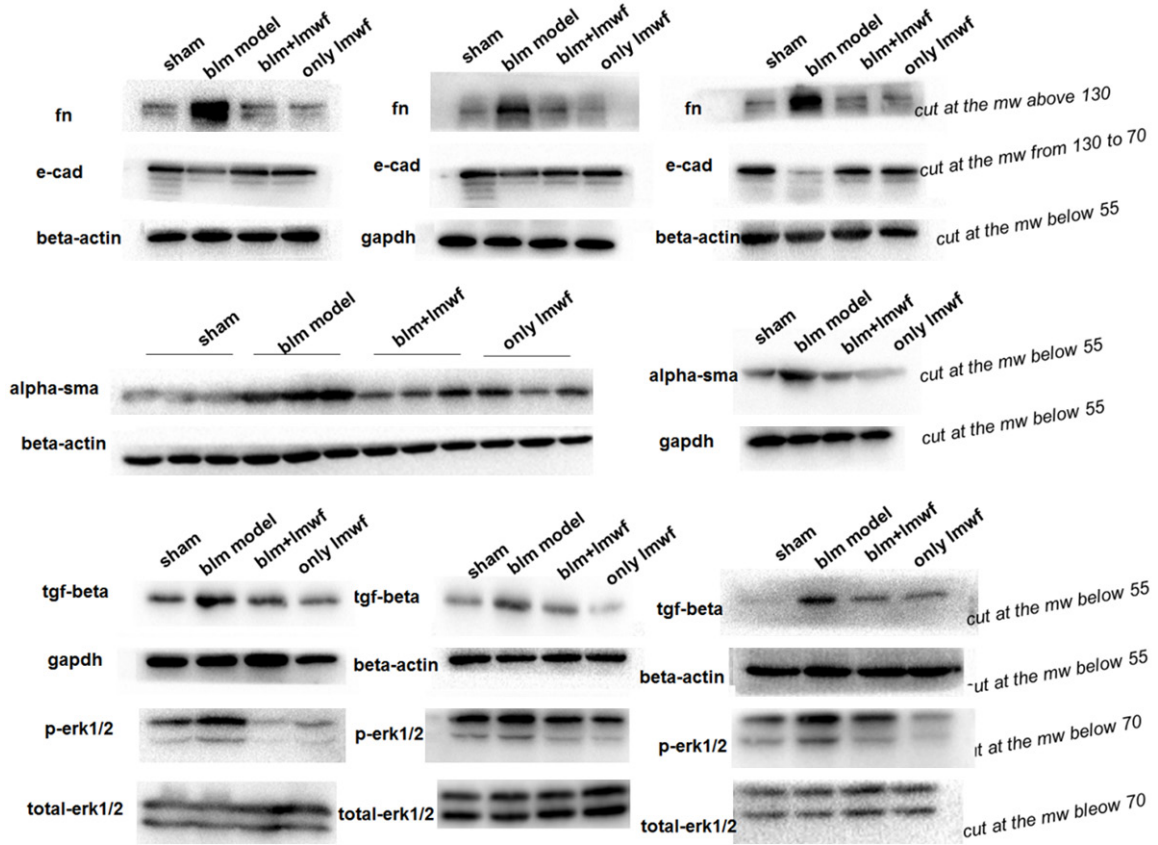

Figure S1. Uncropped western blot images for in vivo study.

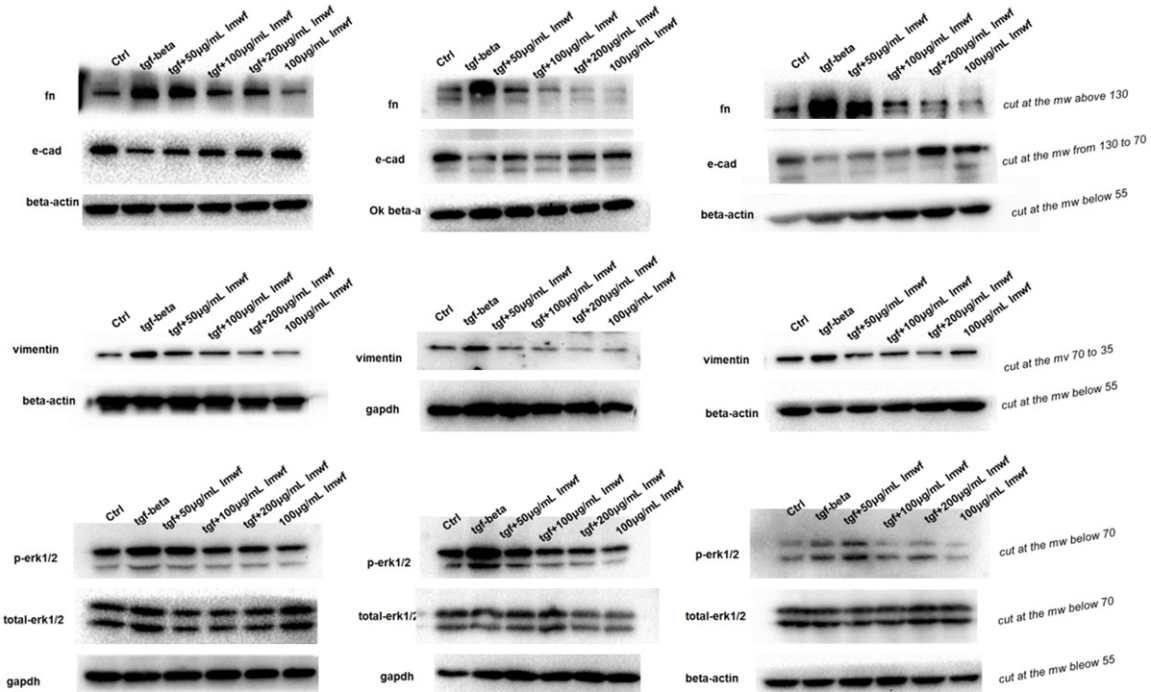

Figure S2. Uncropped western blot images for in vitro study.
